# Supplementary material for: Understanding the decomposition process of the Pt1Ag24(SPhCl2)18 nanocluster at the atomic level
Source: Royal Society of Chemistry journal article supplement (doi:10.1039/d4ra01274g), 2024-01-01
Supplement: d4ra01274g1.pdf [file d4ra01274g1.pdf]

## Supporting Information:

### Understanding the Decomposition Process of $\text{Pt}_1\text{Ag}_{24}(\text{SPhCl}_2)_{18}$

#### Nanocluster at Atomic Level

Kefan Jiang,<sup>a</sup> Along Ma,<sup>a,b</sup> Yuansheng Li,<sup>a</sup> Jiawei Wang,<sup>a</sup> Zhengmao Yin,<sup>\*a</sup> and Shuxin Wang<sup>\*a,b</sup>

<sup>a</sup>College of Materials Science and Engineering, Qingdao University of Science and Technology, Qingdao 266042, P. R. China.

<sup>b</sup>Key Laboratory of Optic-electric Sensing and Analytical Chemistry for Life Science, MOE, Shandong Key Laboratory of Biochemical Analysis, College of Chemistry and Molecular Engineering, Qingdao University of Science and Technology, Qingdao 266042, China.

\*Corresponding authors. E-mail: [shuxin\\_wang@qust.edu.cn](mailto:shuxin_wang@qust.edu.cn) (Shuxin Wang); [yzm198752@163.com](mailto:yzm198752@163.com) (Zhengmao Yin).

Notes: The authors declare no competing financial interest.

### Table of Contents

#### Section 1. Supporting Figures

**Fig. S1** The color change of the solution during the conversion from  $\text{Pt}_1\text{Ag}_{24}(\text{SPhCl}_2)_{18}$  to  $\text{Pt}_1\text{Ag}_4(\text{SR})_8$ .

**Fig. S2** The optical microscopic image of the single crystals of the NC-I, NC-II and  $\text{Pt}_1\text{Ag}_4$ .

**Fig. S3** The overall structure of the NC-I, NC-II nanoclusters and  $\text{Pt}_1\text{Ag}_4$  complex.

**Fig. S4** The UV-vis absorption spectra of the NC-I and NC-II crystals in  $\text{CH}_2\text{Cl}_2$ .

**Fig. S5** The UV-vis absorption spectrum of the  $\text{Pt}_1\text{Ag}_4$  crystals in  $\text{CH}_2\text{Cl}_2$ .

**Fig. S6** X-ray structures of the two  $\text{Pt}_1\text{Ag}_4$  enantiomers viewed from the top.

**Fig. S7** A unit cell in the NC-I and NC-II single crystals.

**Fig. S8** Packing mode of NC-I and NC-II in the crystals shown.

#### Section 2. Supporting Tables

**Table S1.** The crystal structure parameters for NC-I.

**Table S2.** The crystal structure parameters for NC-II.

**Table S3.** The crystal structure parameters for  $\text{Pt}_1\text{Ag}_4$ .

**Table S4.** The occupancy ratio of 2,4-SPhCl<sub>2</sub> and 4-SPhBr units in NC-I, NC-II and  $\text{Pt}_1\text{Ag}_4$ .

**Table S5.** S-Ag bond lengths associated with the ligand in NC-I and NC-II.

## Section 1. Supporting Figures

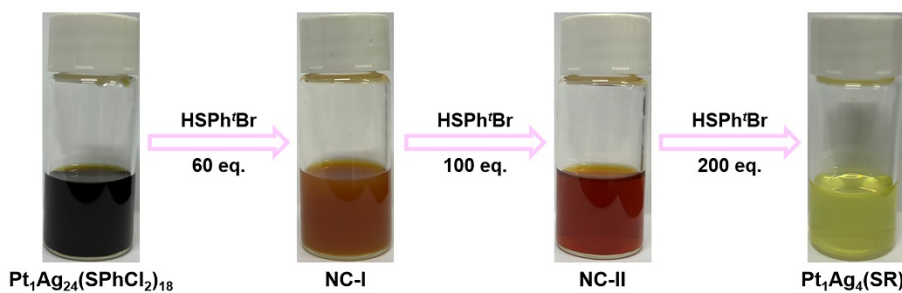

**Fig. S1** The color change of the solution during the conversion from  $\text{Pt}_1\text{Ag}_{24}(\text{SPhCl}_2)_{18}$  to  $\text{Pt}_1\text{Ag}_4(\text{SR})_8$ .

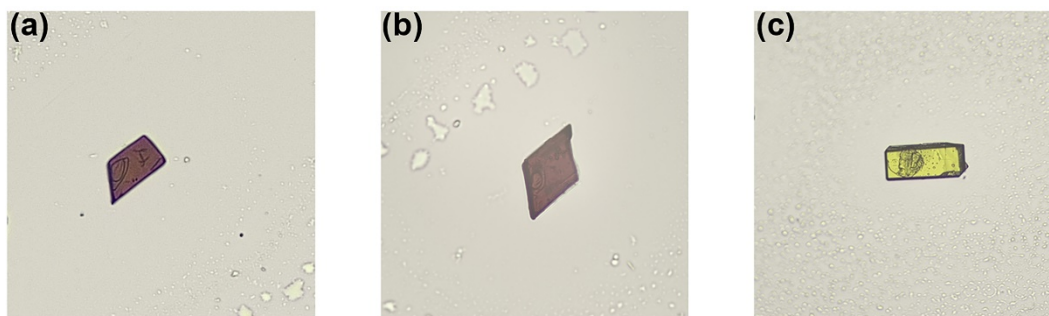

**Fig. S2** The optical microscopic image of the single crystals of the NC-I, NC-II and  $\text{Pt}_1\text{Ag}_4$ . (a) NC-I; (b) NC-II; (c)  $\text{Pt}_1\text{Ag}_4$ .

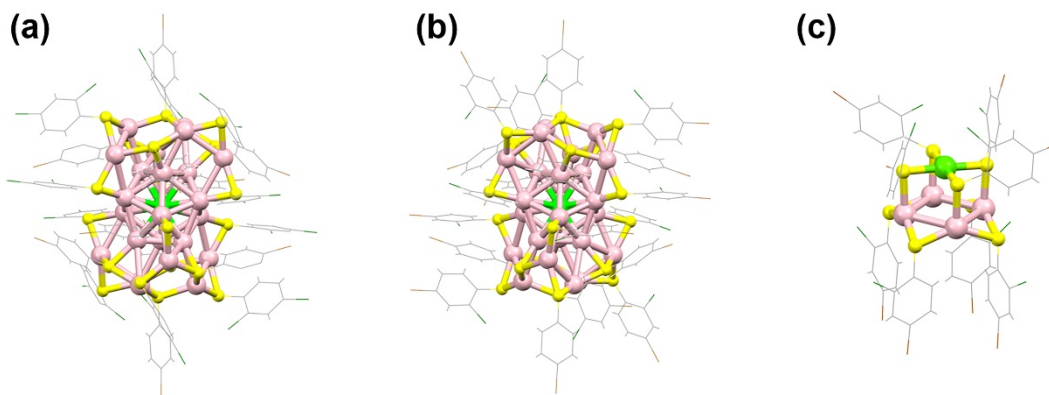

**Fig. S3** The overall structure of the NC-I, NC-II nanoclusters and  $\text{Pt}_1\text{Ag}_4$  complex. (a) NC-I; (b) NC-II; (c)  $\text{Pt}_1\text{Ag}_4$ . Color labels: bright green = Pt; pink = Ag; yellow = S; blue = Cl; brown = Br; grey = C; white = H.

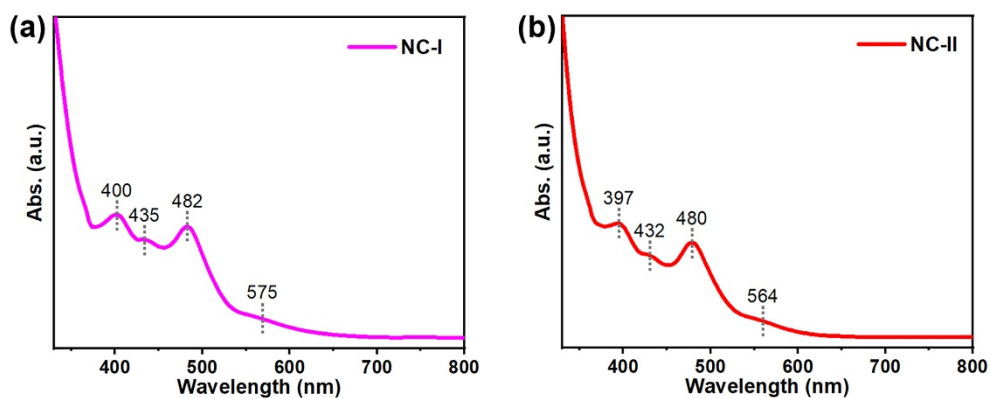

**Fig. S4** The UV-vis absorption spectra of the NC-I and NC-II crystals in  $\text{CH}_2\text{Cl}_2$ . (a) NC-I; (b) NC-II.

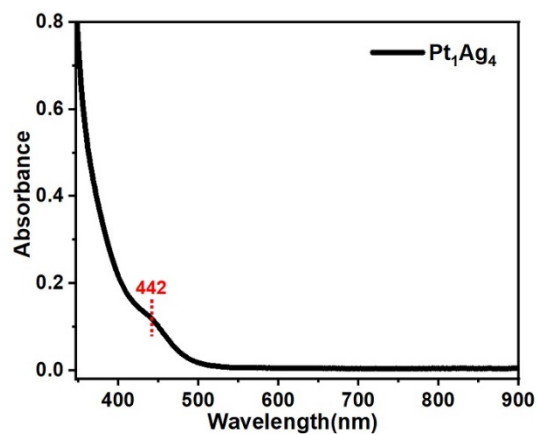

**Fig. S5** The UV-vis absorption spectrum of the  $\text{Pt}_1\text{Ag}_4$  crystals in  $\text{CH}_2\text{Cl}_2$ .

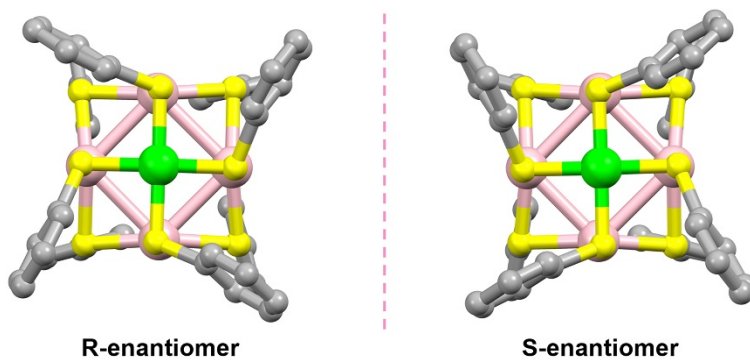

**Fig. S6** X-ray structures of the two  $\text{Pt}_1\text{Ag}_4$  enantiomers viewed from the top. All H, C, Br and Cl atoms are omitted for clarity. Color labels: bright green = Pt; pink = Ag; yellow = S; grey = C.

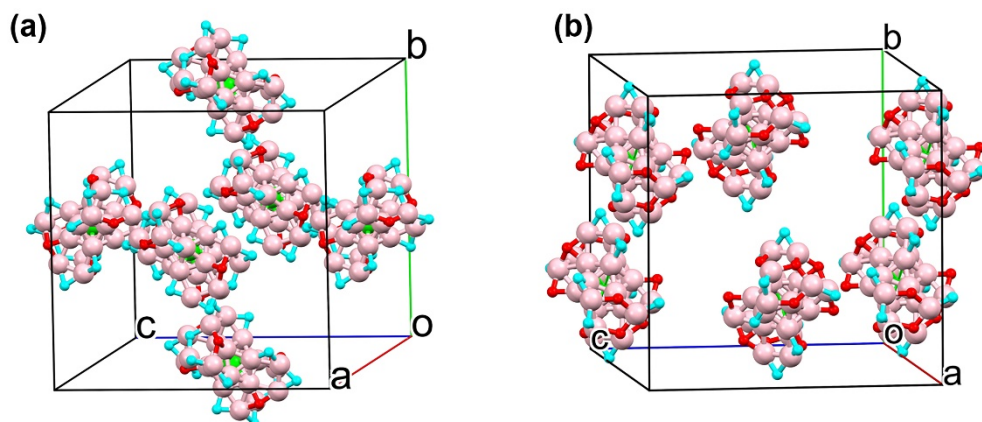

**Fig. S7** A unit cell in the NC-I and NC-II single crystals. (a) NC-I; (b) NC-II. All H atoms, C atoms, Br atoms, Cl atoms and  $\text{PPh}_4^+$  are omitted for clarity. Color labels: bright green = Pt; pink = Ag; red = 4-SPhBr; turquoise = 2,4-SPhCl<sub>2</sub> and 4-SPhBr.

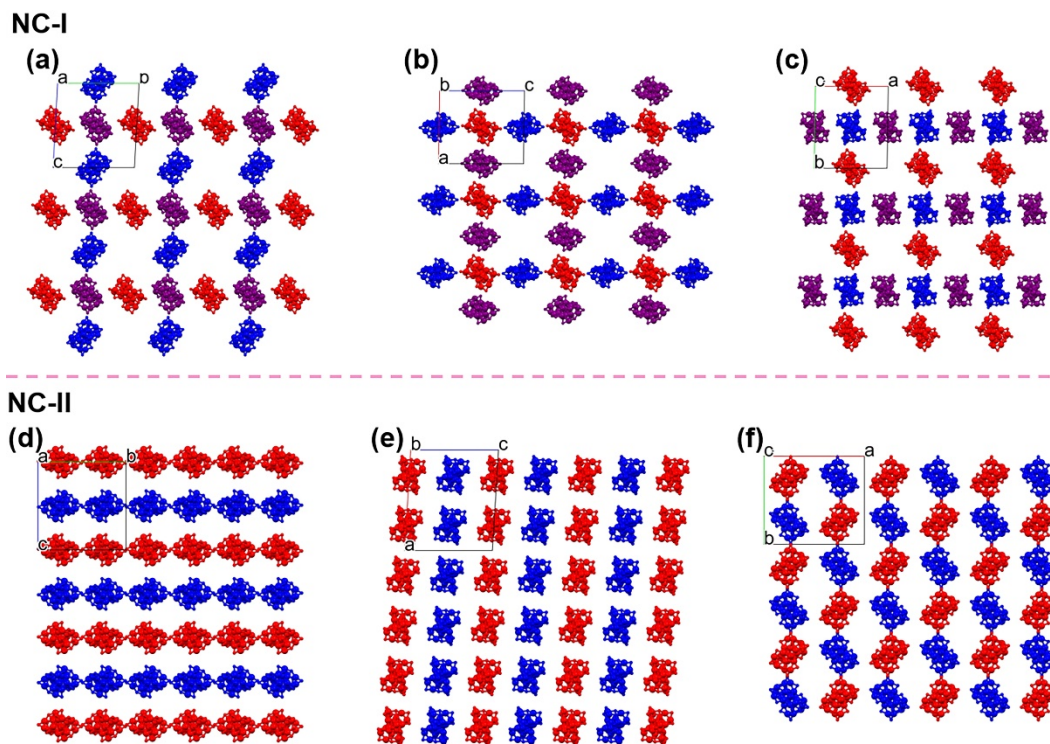

**Fig. S8** Packing mode of NC-I and NC-II in the crystals shown. (a) and (d) along the a axis; (b) and (e) along the b axis; (c) and (f) along the c axis. All H atoms, C atoms and  $\text{PPh}_4^+$  are omitted for clarity. The cluster molecules arranged in different directions show different colors.

## Section 2. Supporting Tables

**Table S1.** The crystal structure parameters for **NC-I**.

|                                                |                                                                 |
|------------------------------------------------|-----------------------------------------------------------------|
| Empirical formula                              | $C_{184}H_{120.67}Ag_{24}Br_{12.49}Cl_{15.03}P_{2.67}PtS_{20}$  |
| Formula weight                                 | 7369.73                                                         |
| Temperature/K                                  | 120                                                             |
| Crystal system                                 | triclinic                                                       |
| Space group                                    | <i>P</i> -1                                                     |
| <i>a</i> /Å                                    | 26.638                                                          |
| <i>b</i> /Å                                    | 29.956                                                          |
| <i>c</i> /Å                                    | 31.053                                                          |
| $\alpha$ /°                                    | 90.09                                                           |
| $\beta$ /°                                     | 90.67                                                           |
| $\gamma$ /°                                    | 90.79                                                           |
| Volume/Å <sup>3</sup>                          | 24739.4                                                         |
| <i>Z</i>                                       | 3                                                               |
| $\rho_{\text{calc}}$ /g/cm <sup>3</sup>        | 1.484                                                           |
| $\mu$ /mm <sup>-1</sup>                        | 16.342                                                          |
| F(000)                                         | 10449.0                                                         |
| Crystal size/mm <sup>3</sup>                   | 0.11 × 0.08 × 0.07                                              |
| Radiation                                      | Cu K $\alpha$ ( $\lambda$ = 1.54186)                            |
| 2 $\Theta$ range for data collection/°         | 6.638 to 139.518                                                |
| Index ranges                                   | -32 ≤ <i>h</i> ≤ 29, -36 ≤ <i>k</i> ≤ 19, -33 ≤ <i>l</i> ≤ 37   |
| Reflections collected                          | 165059                                                          |
| Independent reflections                        | 90081 [ $R_{\text{int}}$ = 0.0487, $R_{\text{sigma}}$ = 0.0557] |
| Data/restraints/parameters                     | 90081/3301/3334                                                 |
| Goodness-of-fit on $F^2$                       | 1.041                                                           |
| Final <i>R</i> indexes [ $I \geq 2\sigma(I)$ ] | $R_1$ = 0.0607, $wR_2$ = 0.1650                                 |
| Final <i>R</i> indexes [all data]              | $R_1$ = 0.0909, $wR_2$ = 0.1850                                 |
| Largest diff. peak/hole / e Å <sup>-3</sup>    | 1.49/-2.32                                                      |

**Table S2.** The crystal structure parameters for NC-II.

|                                                |                                                       |
|------------------------------------------------|-------------------------------------------------------|
| Empirical formula                              | $C_{216}H_{134}Ag_{24}Br_{17.72}Cl_{4.56}P_4PtS_{20}$ |
| Formula weight                                 | 7855.93                                               |
| Temperature/K                                  | 120.15                                                |
| Crystal system                                 | monoclinic                                            |
| Space group                                    | $C2/c$                                                |
| a/Å                                            | 32.937                                                |
| b/Å                                            | 28.819                                                |
| c/Å                                            | 28.779                                                |
| $\alpha/^\circ$                                | 90                                                    |
| $\beta/^\circ$                                 | 93.52                                                 |
| $\gamma/^\circ$                                | 90                                                    |
| Volume/Å <sup>3</sup>                          | 27265.8                                               |
| Z                                              | 4                                                     |
| $\rho_{calc}g/cm^3$                            | 1.914                                                 |
| $\mu/mm^{-1}$                                  | 19.837                                                |
| F(000)                                         | 14855.0                                               |
| Crystal size/mm <sup>3</sup>                   | 0.1 × 0.08 × 0.06                                     |
| Radiation                                      | Cu K $\alpha$ ( $\lambda = 1.54186$ )                 |
| 2 $\Theta$ range for data collection/ $^\circ$ | 8.604 to 139.508                                      |
| Index ranges                                   | -39 ≤ h ≤ 38, -31 ≤ k ≤ 35, -14 ≤ l ≤ 34              |
| Reflections collected                          | 91043                                                 |
| Independent reflections                        | 25046 [ $R_{int} = 0.0827$ , $R_{sigma} = 0.0770$ ]   |
| Data/restraints/parameters                     | 25046/181/1342                                        |
| Goodness-of-fit on F <sup>2</sup>              | 0.946                                                 |
| Final R indexes [ $I \geq 2\sigma(I)$ ]        | $R_1 = 0.0561$ , $wR_2 = 0.1403$                      |
| Final R indexes [all data]                     | $R_1 = 0.0851$ , $wR_2 = 0.1526$                      |
| Largest diff. peak/hole / e Å <sup>-3</sup>    | 1.85/-1.82                                            |

**Table S3.** The crystal structure parameters for **Pt<sub>1</sub>Ag<sub>4</sub>**.

|                                                              |                                                                                                                       |
|--------------------------------------------------------------|-----------------------------------------------------------------------------------------------------------------------|
| Empirical formula                                            | C <sub>96</sub> H <sub>64</sub> Ag <sub>4</sub> Br <sub>3.69</sub> Cl <sub>8.62</sub> P <sub>2</sub> PtS <sub>8</sub> |
| Formula weight                                               | 2762.91                                                                                                               |
| Temperature/K                                                | 170                                                                                                                   |
| Crystal system                                               | triclinic                                                                                                             |
| Space group                                                  | <i>P</i> -1                                                                                                           |
| <i>a</i> /Å                                                  | 17.7833(12)                                                                                                           |
| <i>b</i> /Å                                                  | 17.8696(12)                                                                                                           |
| <i>c</i> /Å                                                  | 18.2588(12)                                                                                                           |
| $\alpha$ /°                                                  | 110.766(2)                                                                                                            |
| $\beta$ /°                                                   | 112.206(2)                                                                                                            |
| $\gamma$ /°                                                  | 90.922(2)                                                                                                             |
| Volume/Å <sup>3</sup>                                        | 4946.9(6)                                                                                                             |
| <i>Z</i>                                                     | 2                                                                                                                     |
| $\rho_{\text{calc}}$ /cm <sup>3</sup>                        | 1.855                                                                                                                 |
| $\mu$ /mm <sup>-1</sup>                                      | 4.156                                                                                                                 |
| F(000)                                                       | 2679.0                                                                                                                |
| Crystal size/mm <sup>3</sup>                                 | 0.12 × 0.11 × 0.09                                                                                                    |
| Radiation                                                    | MoK $\alpha$ ( $\lambda$ = 0.71073)                                                                                   |
| 2 $\Theta$ range for data collection/°                       | 3.82 to 49.998                                                                                                        |
| Index ranges                                                 | -21 ≤ <i>h</i> ≤ 19, -21 ≤ <i>k</i> ≤ 19, 0 ≤ <i>l</i> ≤ 21                                                           |
| Reflections collected                                        | 17189                                                                                                                 |
| Independent reflections                                      | 17189 [ <i>R</i> <sub>sigma</sub> = 0.0547]                                                                           |
| Data/restraints/parameters                                   | 17189/1658/952                                                                                                        |
| Goodness-of-fit on F <sup>2</sup>                            | 1.058                                                                                                                 |
| Final <i>R</i> indexes [ <i>I</i> ≥ 2 $\sigma$ ( <i>I</i> )] | <i>R</i> <sub>1</sub> = 0.0994, <i>wR</i> <sub>2</sub> = 0.2393                                                       |
| Final <i>R</i> indexes [all data]                            | <i>R</i> <sub>1</sub> = 0.1436, <i>wR</i> <sub>2</sub> = 0.2635                                                       |
| Largest diff. peak/hole / e Å <sup>-3</sup>                  | 4.86/-1.72                                                                                                            |

**Table S4.** The occupancy ratio of 2,4-SPhCl<sub>2</sub> and 4-SPhBr units in **NC-I**, **NC-II** and **Pt<sub>1</sub>Ag<sub>4</sub>**. (Notably, the occupancy ratios of **NC-I** are the average occupancy ratios among the three cluster molecules in the single crystal).

| <b>Nanoclusters</b>             | <b>Sites</b> | <b>2,4-SPhCl<sub>2</sub><br/>(occupancy ratio)</b> | <b>4-SPhBr<br/>(occupancy ratio)</b> |
|---------------------------------|--------------|----------------------------------------------------|--------------------------------------|
| NC-I                            | ligand-1     | 50%                                                | 50%                                  |
| NC-II                           | ligand-1     | 14%                                                | 86%                                  |
| NC-I                            | ligand-2     | 42%                                                | 58%                                  |
| NC-II                           | ligand-2     | 24%                                                | 76%                                  |
| NC-I                            | ligand-3     | 79%                                                | 21%                                  |
| NC-II                           | ligand-3     | 25%                                                | 75%                                  |
| NC-I                            | ligand-4     | 71.6%                                              | 28.4%                                |
| NC-II                           | ligand-4     | 0%                                                 | 100%                                 |
| NC-I                            | ligand-5     | 60.7%                                              | 39.3%                                |
| NC-II                           | ligand-5     | 22%                                                | 78%                                  |
| NC-I                            | ligand-6     | 62.3%                                              | 37.7%                                |
| NC-II                           | ligand-6     | 29%                                                | 71%                                  |
| NC-I                            | ligand-7     | 0%                                                 | 100%                                 |
| NC-II                           | ligand-7     | 0%                                                 | 100%                                 |
| NC-I                            | ligand-8     | 0%                                                 | 100%                                 |
| NC-II                           | ligand-8     | 0%                                                 | 100%                                 |
| NC-I                            | ligand-9     | 0%                                                 | 100%                                 |
| NC-II                           | ligand-9     | 0%                                                 | 100%                                 |
| NC-I                            | ligand-10    | 10%                                                | 90%                                  |
| NC-II                           | ligand-10    | 0%                                                 | 100%                                 |
| Pt <sub>1</sub> Ag <sub>4</sub> |              | 46%                                                | 54%                                  |
|                                 |              | 47%                                                | 53%                                  |
|                                 |              | 67%                                                | 33%                                  |
|                                 |              | 45%                                                | 55%                                  |
|                                 |              | 55%                                                | 45%                                  |
|                                 |              | 59%                                                | 41%                                  |
|                                 |              | 53%                                                | 47%                                  |
|                                 |              | 59%                                                | 41%                                  |



**Table S5.** S-Ag bond lengths associated with the ligand in **NC-I** and **NC-II**. (Notably, the bond lengths of **NC-I** are the average bond lengths among the three cluster molecules in the single crystal).

| <b>S-Ag Bonds in NC-I</b>  | <b>Average bond lengths (Å) in NC-I</b> | <b>S-Ag Bonds in NC-II</b> | <b>bond lengths (Å) in NC-II</b> |
|----------------------------|-----------------------------------------|----------------------------|----------------------------------|
| S <sub>ligand-1</sub> -Ag  | 2.433                                   | S <sub>ligand-1</sub> -Ag  | 2.486                            |
| S <sub>ligand-1</sub> -Ag  | 2.516                                   | S <sub>ligand-1</sub> -Ag  | 2.411                            |
| S <sub>ligand-2</sub> -Ag  | 2.434                                   | S <sub>ligand-2</sub> -Ag  | 2.445                            |
| S <sub>ligand-2</sub> -Ag  | 2.499                                   | S <sub>ligand-2</sub> -Ag  | 2.488                            |
| S <sub>ligand-3</sub> -Ag  | 2.436                                   | S <sub>ligand-3</sub> -Ag  | 2.438                            |
| S <sub>ligand-3</sub> -Ag  | 2.491                                   | S <sub>ligand-3</sub> -Ag  | 2.489                            |
| S <sub>ligand-4</sub> -Ag  | 2.481                                   | S <sub>ligand-4</sub> -Ag  | 2.482                            |
| S <sub>ligand-4</sub> -Ag  | 2.45                                    | S <sub>ligand-4</sub> -Ag  | 2.444                            |
| S <sub>ligand-5</sub> -Ag  | 2.458                                   | S <sub>ligand-5</sub> -Ag  | 2.459                            |
| S <sub>ligand-5</sub> -Ag  | 2.454                                   | S <sub>ligand-5</sub> -Ag  | 2.468                            |
| S <sub>ligand-6</sub> -Ag  | 2.448                                   | S <sub>ligand-6</sub> -Ag  | 2.465                            |
| S <sub>ligand-6</sub> -Ag  | 2.446                                   | S <sub>ligand-6</sub> -Ag  | 2.459                            |
| S <sub>ligand-7</sub> -Ag  | 2.489                                   | S <sub>ligand-7</sub> -Ag  | 2.488                            |
| S <sub>ligand-7</sub> -Ag  | 2.494                                   | S <sub>ligand-7</sub> -Ag  | 2.490                            |
| S <sub>ligand-7</sub> -Ag  | 2.567                                   | S <sub>ligand-7</sub> -Ag  | 2.579                            |
| S <sub>ligand-8</sub> -Ag  | 2.477                                   | S <sub>ligand-8</sub> -Ag  | 2.499                            |
| S <sub>ligand-8</sub> -Ag  | 2.470                                   | S <sub>ligand-8</sub> -Ag  | 2.469                            |
| S <sub>ligand-8</sub> -Ag  | 2.629                                   | S <sub>ligand-8</sub> -Ag  | 2.604                            |
| S <sub>ligand-9</sub> -Ag  | 2.515                                   | S <sub>ligand-9</sub> -Ag  | 2.539                            |
| S <sub>ligand-9</sub> -Ag  | 2.483                                   | S <sub>ligand-9</sub> -Ag  | 2.467                            |
| S <sub>ligand-9</sub> -Ag  | 2.596                                   | S <sub>ligand-9</sub> -Ag  | 2.612                            |
| S <sub>ligand-10</sub> -Ag | 2.552                                   | S <sub>ligand-10</sub> -Ag | 2.542                            |
| S <sub>ligand-10</sub> -Ag | 2.552                                   | S <sub>ligand-10</sub> -Ag | 2.557                            |
| S <sub>ligand-10</sub> -Ag | 2.505                                   | S <sub>ligand-10</sub> -Ag | 2.543                            |
